# Supplementary material for: Risk factors and predictive model for renal outcomes in autoimmune membranous nephropathy with and without acute kidney injury: a retrospective cohort study
Source: PeerJ. 2025 Apr 16;13:e19331. doi: 10.7717/peerj.19331 (PMC12009024; doi:10.7717/peerj.19331)
Supplement: Supplemental Information 2 [file peerj-13-19331-s002.xlsx]

## Sheet: Sheet1
Variable Description	Categorical Data	Status Numbers
		1	0
AKI	aki_group	yes	no
eGFR_decline＞40% from baseline	egfr_d40	yes	no
ESRD	esrd	yes	no
Scr_doubling from baseline	scr_d	yes	no
Endpoint	endpoint	yes	no
Sex	sex	male	female
SBP >=130 mmHg	sbp_Bi	yes	no
DBP >=80 mmHg	dbp_Bi	yes	no
Hematuria	bld_Bi	yes	no
Hypertension	HT	yes	no
Diabetes	DB	yes	no
ACEI/ARB	acei_arb	yes	no
Glucocorticoids	gluc	yes	no
Immunosuppressants	imus	yes	no
FK506	cni	yes	no
Mycophenolate mofetil	mmf	yes	no
Cyclophosphamide	ctx	yes	no
Cyclosporine	cyc	yes	no
Monoclonal antibody biological agents	mAb	yes	no
Serum PLA2R antibody and its tiers	pla2r_ab	positive	negative
	pla2_10 (1: 10)	yes	no
	pla2_32 (1: 32)	yes	no
	pla2_100 (1: 100)	yes	no
	pla2_320 (1: 320)	yes	no
Glomerular sclerosis	glomer_scle	yes	no
Crescent formation	crescent_formation	yes	no
Kidney IgG deposition	igg_situ_mtp_Bi	yes	no
Kidney C3 deposition	c3_situ_mtp_Bi	yes	no
Kidney IgG4 deposition	igg4_situ_mtp_Bi	yes	no
kidney PLA2R staining and its scales	pla2r_situ	positive	negative
	pla2r_situ_mtp_1 (1+)	yes	no
	pla2r_situ_mtp_2 (2+)	yes	no
	pla2r_situ_mtp_3 (3+)	yes	no
	pla2r_situ_mtp_4 (4+)	yes	no
Tubular atrophy	tubular__atrophy_mtp_Bi	yes	no
Interstitial inflammatory infiltration	interstitial_infla_mtp_Bi	yes	no
Interstitial fibrosis	interstitial_fibro_mtp_Bi	yes	no
